# Supplementary material
Source: Springer Nature journal article supplement (https://www.springermedizin.de/resource/supplementary/12885_2006_613_MOESM8_ESM.pdf/9469896)
Supplement: MOESM8 [file 9469896]

**Table 4.** Median age at first birth of females in Singapore, stratified by ethnicity and calendar year.

| Ethnic group | Calendar year |       |       |       |       |       |       | Average rate of increase per year (%) |
|--------------|---------------|-------|-------|-------|-------|-------|-------|---------------------------------------|
|              | 1970          | 1975  | 1980  | 1985  | 1990  | 1995  | 2000  |                                       |
| Chinese      | 23.77         | 24.80 | 25.95 | 27.08 | 28.11 | 28.55 | 28.93 | 0.66                                  |
| Malay        | 21.57         | 22.25 | 23.17 | 23.75 | 24.81 | 25.38 | 25.59 | 0.57                                  |
| Indian       | 24.93         | 25.08 | 26.16 | 26.94 | 28.32 | 29.07 | 29.18 | 0.53                                  |
